# Supplementary material for: Colistin Dependency among Colistin-Heteroresistant Acinetobacter baumannii Isolates
Source: MDPI journal article supplement (doi:10.3390/microorganisms10010058), 2021-12-28
Supplement: s1 [file s1]

## Supplementary Materials

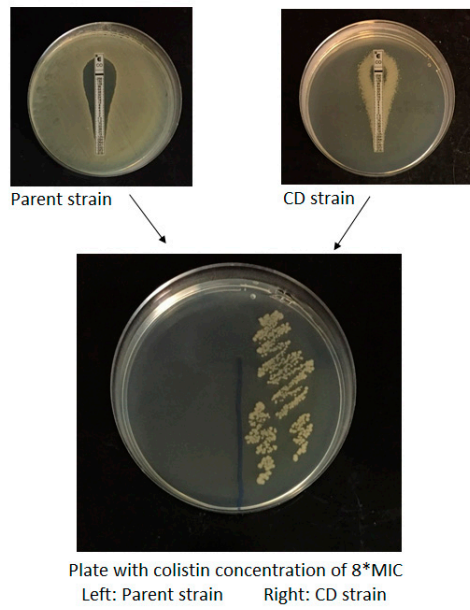

Figure S1. Verification of colistin dependency by Etest. Parent strain (left) and CD strain (right) from Etest plates were streaked onto a colistin-containing plate (on left and right sides of plate, respectively). Displayed is a representative strain (AB2); similar results were obtained for all CD strains.
